# Supplementary material
Source: PubMed Central journal article supplement (PMC4505772)
Supplement: Supp_Fig1.pdf [file Supp_Fig1.pdf]

## Supplementary Data

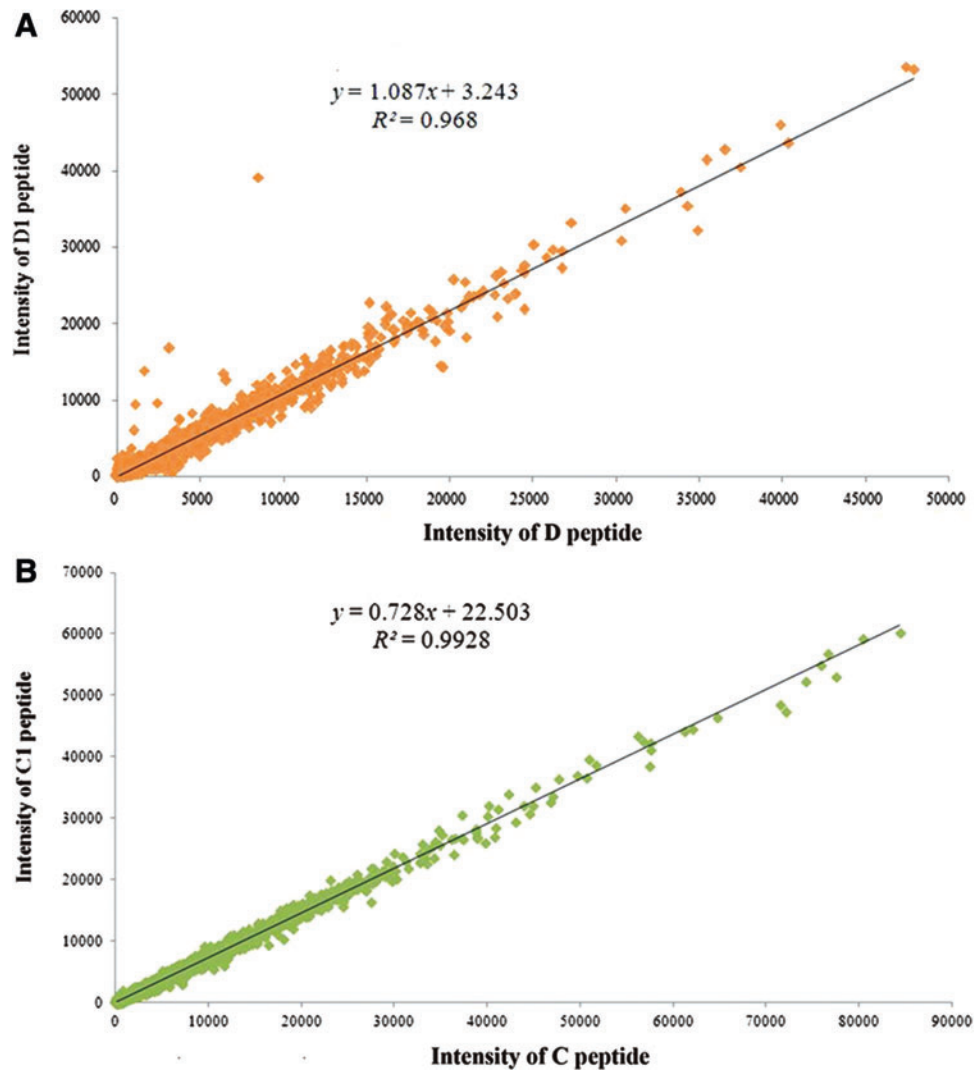

**SUPPLEMENTARY FIG. S1.** Correlation between peptide label intensities with different iTRAQ tags. **(A)** D and D1 indicate 115 and 116, respectively. **(B)** C and C1 indicate 119 and 121, respectively.
