# Supplementary material
Source: PubMed Central journal article supplement (PMC4505772)
Supplement: Supp_Fig2.pdf [file Supp_Fig2.pdf]

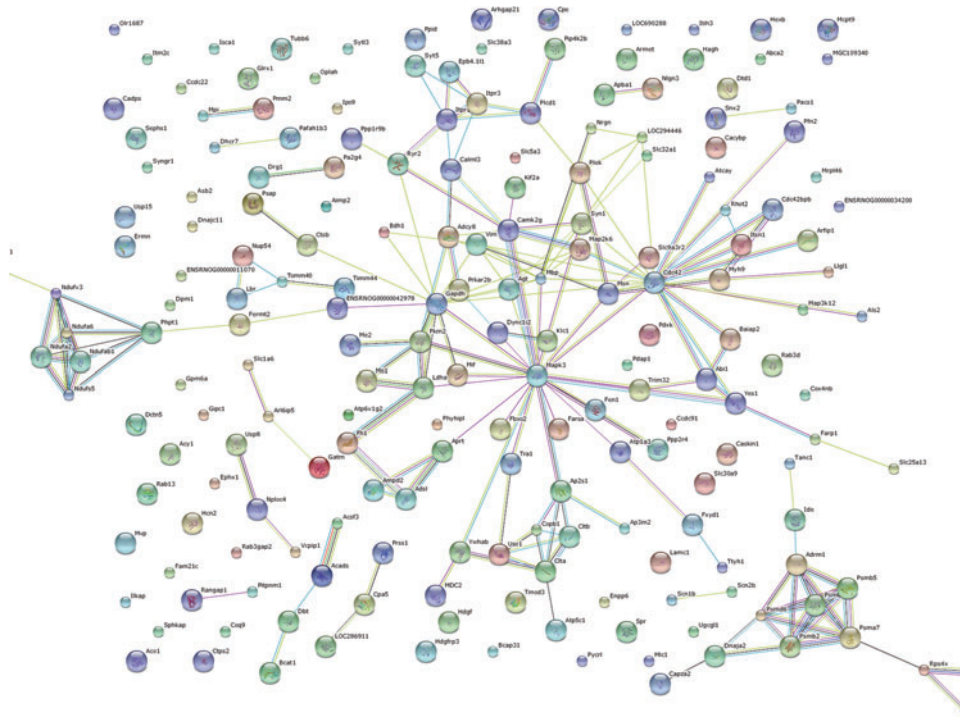

**SUPPLEMENTARY FIG. S2.** Network analysis of the differentially expressed proteins using STRING 9. *Colored spheres* represent dysregulated proteins. *Lime green lines* represent neighborhoods. *Purple lines* represent experiments. *Regular blue lines* represent databases. *Light blue lines* represent homologies. *Deep blue lines* represent co-occurrences. *Black lines* represent co-expressions. *Red lines* represent gene fusions. *Yellow lines* represent text mining.
