# Supplementary material
Source: PubMed Central journal article supplement (PMC4505772)
Supplement: Supp_Table1.pdf [file Supp_Table1.pdf]

SUPPLEMENTARY TABLE S1. DIFFERENTIAL PROTEINS IDENTIFIED BY iTRAQ PROTEOMICS

| <i>IPI No.</i> | <i>Gene symbol</i> | <i>Protein name</i>                                                            | <i>Biological function</i>            | <i>Fold change</i> | <i>State change</i> |
|----------------|--------------------|--------------------------------------------------------------------------------|---------------------------------------|--------------------|---------------------|
| IPI00211640    | Cpa5               | Carboxypeptidase A5                                                            | Protein turnover                      | 0.093              | ↓                   |
| IPI00363977    | Rpap1              | RNA polymerase II-associated protein 1                                         | RNA biosynthesis                      | 0.093              | ↓                   |
| IPI00210113    | Rere               | Arginine-glutamic acid dipeptide repeats protein                               | Transcription/translation             | 0.491              | ↓                   |
| IPI00464798    | Dync1i2            | Dynein, cytoplasmic, intermediate chain 2, isoform CRA_b                       | Cytoskeleton                          | 0.511              | ↓                   |
| IPI00373072    | Morc1              | MORC family CW-type zinc finger 1                                              | Transcription/translation             | 0.512              | ↓                   |
| IPI00760126    | Ywhab              | Isoform Short of 14-3-3 protein beta/alpha                                     | Signaling                             | 0.546              | ↓                   |
| IPI00208568    | Plek               | Pleckstrin                                                                     | Cytoskeleton                          | 0.549              | ↓                   |
| IPI00197709    | Bglap              | Osteocalcin                                                                    | calcium metabolism                    | 0.553              | ↓                   |
| IPI00464518    | Hexb               | Beta-hexosaminidase subunit beta                                               | Lipid metabolism                      | 0.577              | ↓                   |
| IPI00358830    | Mak16              | RNA binding motif protein 13                                                   | rRNA/ribosome processing              | 0.601              | ↓                   |
| IPI00200523    | Slc9a3r2           | Na(+)/H(+) exchange regulatory cofactor NHE-RF2                                | Scaffolding                           | 0.615              | ↓                   |
| IPI00362992    | Aldh5a1            | Aldehyde dehydrogenase 5 family, member A1 isoform 3                           | Glucose metabolism                    | 0.622              | ↓                   |
| IPI00189882    | Scn2b              | Sodium channel subunit beta-2                                                  | Ion channel                           | 0.64               | ↓                   |
| IPI00201507    | Ifrd1              | Interferon-related developmental regulator 1                                   | Neuroplasticity                       | 0.643              | ↓                   |
| IPI00204510    | Adrm1              | Proteasomal ubiquitin receptor ADRM1                                           | Protein turnover                      | 0.647              | ↓                   |
| IPI00212767    | Prss1              | Anionic trypsin-1                                                              | Protein turnover                      | 0.648              | ↓                   |
| IPI00914189    | Eif3c              | Eukaryotic translation initiation factor 3 subunit C                           | Transcription/translation             | 0.652              | ↓                   |
| IPI00366422    | Pycr1              | Pyroline-5-carboxylate reductase 3                                             | Amino acid metabolism                 | 0.67               | ↓                   |
| IPI00287835    | Hba-a2             | Hemoglobin subunit alpha-1/2                                                   |                                       | 0.671              | ↓                   |
| IPI00195173    | Cd59               | CD59 glycoprotein                                                              | Apoptosis                             | 0.677              | ↓                   |
| IPI00365951    | Atcay              | Caytaxin                                                                       | Amino acid metabolism                 | 0.679              | ↓                   |
| IPI00196730    | Camk2g             | Isoform A of Calcium/calmodulin-dependent protein kinase type II subunit gamma | Neuroplasticity                       | 0.688              | ↓                   |
| IPI00211968    | Map3k12            | Mitogen-activated protein kinase kinase kinase 12                              | Signaling                             | 0.693              | ↓                   |
| IPI00198890    | MGC109340          | Signal peptidase complex subunit 3                                             | Protein turnover                      | 0.694              | ↓                   |
| IPI00569391    | Tmpo               | Lamina-associated polypeptide 2, isoform beta                                  | Transcription/translation             | 0.694              | ↓                   |
| IPI00214981    | Adcy8              | Adenylate cyclase type 8                                                       | Signaling                             | 0.695              | ↓                   |
| IPI00870489    | Snx2               | Sorting nexin 2                                                                | Exocytosis/endocytosis                | 0.696              | ↓                   |
| IPI00231650    | Hist1h1d           | Histone H1.2                                                                   | Transcription/translation             | 0.698              | ↓                   |
| IPI00202697    | Rab13              | Ras-related protein Rab-13                                                     | Transport                             | 0.699              | ↓                   |
| IPI00367933    | Kif2a              | Isoform 2 of Kinesin-like protein KIF2A                                        | Cytoskeleton                          | 0.699              | ↓                   |
| IPI00212603    | Pnpo               | Pyridoxine-5 ~ -phosphate oxidase                                              | Vitamin B6 metabolism                 | 0.703              | ↓                   |
| IPI00230897    | Hbb                | Hemoglobin subunit beta-1                                                      |                                       | 0.703              | ↓                   |
| IPI00204130    | Hdgfrp3            | Hepatoma-derived growth factor-related protein 3                               | Neuroplasticity                       | 0.714              | ↓                   |
| IPI00327502    | Sftpa1             | Pulmonary surfactant-associated protein A                                      | surfactant protein /anti-inflammatory | 0.717              | ↓                   |
| IPI00200122    | Slc38a3            | Sodium-coupled neutral amino acid transporter 3                                | Transport                             | 0.718              | ↓                   |
| IPI00207146    | Hbb-b1             | Zero beta-globin                                                               |                                       | 0.718              | ↓                   |
| IPI00359829    | Dctn5              | Dynactin 5                                                                     | Adaptor protein                       | 0.72               | ↓                   |
| IPI00950461    | Birc6              | Protein Birc6                                                                  | Apoptosis                             | 0.72               | ↓                   |
| IPI00870052    | Rfc5               | Replication factor C (Activator 1) 5                                           | Transcription/translation             | 0.724              | ↓                   |

(continued)

SUPPLEMENTARY TABLE S1. (CONTINUED)

| <i>IPI No.</i> | <i>Gene symbol</i> | <i>Protein name</i>                                                       | <i>Biological function</i> | <i>Fold change</i> | <i>State change</i> |
|----------------|--------------------|---------------------------------------------------------------------------|----------------------------|--------------------|---------------------|
| IPI00367678    | Tex21              | Testis expressed gene 21                                                  |                            | 0.726              | ↓                   |
| IPI00287309    | Gpm6a              | Glycoprotein m6a, isoform CRA_b                                           | Scaffolding                | 0.734              | ↓                   |
| IPI00213685    | Rab3d              | GTP-binding protein Rab-3D                                                | Exocytosis/endocytosis     | 0.735              | ↓                   |
| IPI00764765    | LOC690295          | dynein, axonemal, heavy polypeptide 14-like                               | Cytoskeleton               | 0.736              | ↓                   |
| IPI00193878    | Isca1              | Iron-sulfur cluster assembly 1 homolog, mitochondrial                     | Scaffolding                | 0.737              | ↓                   |
| IPI00188732    | Syngn1             | Synaptogyrin 1, isoform CRA_c                                             | Neuroplasticity            | 0.739              | ↓                   |
| IPI00205801    | Usp15              | Ubiquitin carboxyl-terminal hydrolase                                     | Protein turnover           | 0.748              | ↓                   |
| IPI00199609    | Ide                | Insulin-degrading enzyme                                                  | Protein turnover           | 0.753              | ↓                   |
| IPI00331894    | Rnasel             | 2-,5-oligoadenylate synthetase-dependent ribonuclease L                   | Immunity/inflammatory      | 0.753              | ↓                   |
| IPI00189463    | Psm6               | Proteasome (Prosome, macropain) 26S subunit, non-ATPase, 6, isoform CRA_a | Protein turnover           | 0.754              | ↓                   |
| IPI00948428    | Nedd8              | Neural precursor cell expressed, developmentally down-regulated 8         | —                          | 0.755              | ↓                   |
| IPI00373218    | Ppid               | Peptidyl-prolyl cis-trans isomerase D                                     | Chaperone                  | 0.756              | ↓                   |
| IPI00948259    | Mthfd1             | Formyltetrahydrofolate synthetase                                         |                            | 0.759              | ↓                   |
| IPI00766956    | Hist1h1b           | Histone H1.5                                                              | Transcription/translation  | 0.76               | ↓                   |
| IPI00476739    | Sphkap             | A-kinase anchor protein SPHKAP                                            | Signaling                  | 0.762              | ↓                   |
| IPI00371101    | Sema7a             | Semaphorin 7A, GPI membrane anchor                                        | Immunity/inflammatory      | 0.762              | ↓                   |
| IPI00231797    | Slc32a1            | Vesicular inhibitory amino acid transporter                               | Transport                  | 0.763              | ↓                   |
| IPI00199911    | Arfp1              | Arfaptin-1                                                                | Transport                  | 0.764              | ↓                   |
| IPI00390362    | Ndufv3             | NADH dehydrogenase [ubiquinone] flavoprotein 3, mitochondrial             | Electron transport chain   | 0.765              | ↓                   |
| IPI00480687    | Marcks             | Myristoylated alanine-rich C-kinase substrate                             | Cytoskeleton               | 0.769              | ↓                   |
| IPI00515845    | Ncald              | Neurocalcin-delta                                                         | Signaling                  | 0.771              | ↓                   |
| IPI00230927    | Cltb               | Isoform Non-brain of Clathrin light chain B                               | Neuroplasticity            | 0.773              | ↓                   |
| IPI00209203    | Olr1687            | Olfactory receptor (Fragment)                                             | Signaling                  | 0.774              | ↓                   |
| IPI00231451    | Atp1a3             | Sodium/potassium-transporting ATPase subunit alpha-3                      | ATP biosynthesis           | 0.777              | ↓                   |
| IPI00195248    | Ufd11              | Ubiquitin fusion degradation protein 1 homolog                            | Protein turnover           | 0.78               | ↓                   |
| IPI00231191    | Glr1               | Glutaredoxin-1                                                            | Electron transport chain   | 0.782              | ↓                   |
| IPI00327830    | Fabp5              | Fatty acid-binding protein, epidermal                                     | Lipid metabolism           | 0.783              | ↓                   |
| IPI00193595    | Eif4a2             | Eukaryotic initiation factor 4A-II                                        | Transcription/translation  | 0.784              | ↓                   |
| IPI00206395    | Mcpt9              | Granzyme J                                                                | Protein turnover           | 0.785              | ↓                   |
| IPI00203239    | Epb4111            | Isoform L of Band 4.1-like protein 1                                      | Cytoskeleton               | 0.785              | ↓                   |
| IPI00367047    | Irgq               | Immunity-related GTPase family, Q                                         | Immunity/inflammatory      | 0.785              | ↓                   |
| IPI00869525    | Klf12              | Kruppel-like factor 12 (Predicted), isoform CRA_a                         | Transcription/translation  | 0.787              | ↓                   |
| IPI00193361    | Atp8a1             | ATPase, aminophospholipid transporter (APLT), class I, type 8A, member 1  | ATP biosynthesis           | 0.788              | ↓                   |
| IPI00326563    | Caskin1            | Caskin-1                                                                  | Signaling                  | 0.79               | ↓                   |
| IPI00198191    | Cacybp             | Calcyclin-binding protein                                                 | Protein turnover           | 0.791              | ↓                   |
| IPI00896142    | Syt13              | Syt13 protein                                                             | Transport                  | 0.791              | ↓                   |
| IPI00944217    | Cee                | Conserved edge expressed protein                                          |                            | 0.791              | ↓                   |
| IPI00211212    | Prss3              | Cationic trypsin-3                                                        | Protein turnover           | 0.795              | ↓                   |

(continued)

SUPPLEMENTARY TABLE S1. (CONTINUED)

| <i>IPI No.</i> | <i>Gene symbol</i> | <i>Protein name</i>                                                   | <i>Biological function</i> | <i>Fold change</i> | <i>State change</i> |
|----------------|--------------------|-----------------------------------------------------------------------|----------------------------|--------------------|---------------------|
| IPI00189770    | Nup54              | Nuclear pore complex protein<br>Nup54                                 | Transport                  | 0.799              | ↓                   |
| IPI00365985    | Hsp90b1            | Isoform 1 of Endoplasmic<br>Protein IMPACT                            | Chaperone                  | 0.799              | ↓                   |
| IPI00553918    | Impact             | Protein IMPACT                                                        | Transcription/translation  | 0.8                | ↓                   |
| IPI00190699    | Opcml              | Isoform 1 of Opioid-binding<br>protein/cell adhesion molecule         | cell adhesion              | 0.8                | ↓                   |
| IPI00326984    | Itih3              | Inter-alpha-trypsin inhibitor heavy<br>chain H3                       | hyaluronan metabolic       | 0.804              | ↓                   |
| IPI00363849    | Lamc1              | laminin, gamma 1                                                      | Neuroplasticity            | 0.804              | ↓                   |
| IPI00209253    | Gipc1              | PDZ domain-containing protein<br>GIPC1                                | Signaling                  | 0.805              | ↓                   |
| IPI00191103    | Ndufa2             | NADH dehydrogenase [ubiquinone]<br>1 alpha subcomplex subunit 2       | Electron transport chain   | 0.807              | ↓                   |
| IPI00365600    | Prkar2b            | cAMP-dependent protein kinase<br>type II-beta regulatory subunit      | Signaling                  | 0.807              | ↓                   |
| IPI00230855    | S100a1             | Protein S100-A1                                                       | Transcription/translation  | 0.807              | ↓                   |
| IPI00765168    | Pura               | Purine rich element binding<br>protein A                              | Nucleotide biosynthesis    | 0.807              | ↓                   |
| IPI00191288    | Cox4nb             | Neighbor of COX4                                                      | Electron transport chain   | 0.809              | ↓                   |
| IPI00373587    | Ppp2r4             | Protein phosphatase 2A,<br>regulatory subunit B                       | Neuroplasticity            | 0.809              | ↓                   |
| IPI00365532    | Cpsf3              | Cleavage and polyadenylation<br>specificity factor 3                  | endonuclease activity      | 0.81               | ↓                   |
| IPI00206993    | Baiap2             | Brain-specific angiogenesis<br>inhibitor 1-associated protein 2       | Cytoskeleton               | 0.813              | ↓                   |
| IPI00896761    | LOC683788          | Fascin                                                                | Cytoskeleton               | 0.813              | ↓                   |
| IPI00198693    | Atp6v1g2           | V-type proton ATPase subunit<br>G 2                                   | ATP biosynthesis           | 0.814              | ↓                   |
| IPI00326566    | Hdgf               | Hepatoma-derived growth factor                                        | Neuroplasticity            | 0.814              | ↓                   |
| IPI00389828    | Ermn               | Isoform 1 of Ermin                                                    | Cytoskeleton               | 0.814              | ↓                   |
| IPI00324618    | Uso1               | General vesicular transport factor<br>p115                            | Neuroplasticity            | 0.815              | ↓                   |
| IPI00371634    | Bcap31             | B-cell receptor-associated protein<br>31, isoform CRA_a               | Signaling                  | 0.815              | ↓                   |
| IPI00231780    | H1f0               | Histone H1.0                                                          | Transcription/translation  | 0.815              | ↓                   |
| IPI00944224    | Hagh               | Isoform 1 of<br>Hydroxyacylglutathione<br>hydrolase, mitochondrial    | carbohydrate metabolic     | 0.817              | ↓                   |
| IPI00391102    | Rab3gap2           | rab3 GTPase-activating protein<br>non-catalytic subunit               | Exocytosis/endocytosis     | 0.817              | ↓                   |
| IPI00371270    | Pa2g4              | Proliferation-associated 2G4,<br>isoform CRA_a                        | Neuroplasticity            | 0.821              | ↓                   |
| IPI00195673    | Tubb6              | Tubulin, beta 6                                                       | Cytoskeleton               | 0.821              | ↓                   |
| IPI00370681    | Capza2             | F-actin-capping protein subunit<br>alpha-2                            | Cytoskeleton               | 0.822              | ↓                   |
| IPI00369683    | Prpf8              | Pre-mRNA-processing-splicing<br>factor 8                              | splicing                   | 0.822              | ↓                   |
| IPI00196750    | Ssbp1              | Single-stranded DNA-binding<br>protein, mitochondrial                 | Transcription/translation  | 0.824              | ↓                   |
| IPI00951020    | Slc1a6             | Excitatory amino acid<br>transporter 4                                | Transport                  | 0.826              | ↓                   |
| IPI00949378    | Myh9               | Myosin-9                                                              | Cytoskeleton               | 0.827              | ↓                   |
| IPI00231953    | Copb2              | Coatamer subunit beta                                                 | Cytoskeleton               | 0.827              | ↓                   |
| IPI00207305    | Clta               | Isoform Brain of Clathrin light<br>chain A                            | Exocytosis/endocytosis     | 0.829              | ↓                   |
| IPI00191737    | Alb                | Serum albumin                                                         | stress related             | 0.829              | ↓                   |
| IPI00361492    | Phyhipl            | Isoform 1 of Phytanoyl-CoA<br>hydroxylase-interacting<br>protein-like | Neuroplasticity            | 0.83               | ↓                   |
| IPI00551732    | Dnaja2             | DnaJ (Hsp40) homolog, subfamily<br>A, member 2, isoform CRA_b         | Chaperone                  | 0.831              | ↓                   |

(continued)

SUPPLEMENTARY TABLE S1. (CONTINUED)

| <i>IPI No.</i> | <i>Gene symbol</i> | <i>Protein name</i>                                                                                        | <i>Biological function</i> | <i>Fold change</i> | <i>State change</i> |
|----------------|--------------------|------------------------------------------------------------------------------------------------------------|----------------------------|--------------------|---------------------|
| IPI00400748    | Lcmt1              | Leucine carboxyl methyltransferase 1                                                                       | methyltransferase activity | 0.831              | ↓                   |
| IPI00562653    | Ctsb               | Cathepsin B preproprotein                                                                                  | Protein turnover           | 0.833              | ↓                   |
| IPI00230941    | Vim                | Vimentin                                                                                                   | Cytoskeleton               | 0.833              | ↓                   |
| IPI00212258    | Phpt1              | Phosphohistidine phosphatase 1 (Predicted), isoform CRA_a                                                  | Vitamin B7 metabolism      | 1.202              | ↑                   |
| IPI00212141    | Mlf2               | Myeloid leukemia factor 2 (Predicted), isoform CRA_a                                                       | Transcription/translation  | 1.202              | ↑                   |
| IPI00362452    | RGD1564958         | Glyceraldehyde-3-phosphate dehydrogenase-like                                                              | Glucose metabolism         | 1.203              | ↑                   |
| IPI00231929    | Pkm2               | Isoform M1 of Pyruvate kinase isozymes M1/M2                                                               | Glucose metabolism         | 1.204              | ↑                   |
| IPI00362580    | Ccdc22             | Coiled-coil domain-containing protein 22                                                                   | Transport                  | 1.204              | ↑                   |
| IPI00959472    | Trip11             | Thyroid hormone receptor interactor 11 isoform 2                                                           | Coactivator                | 1.205              | ↑                   |
| IPI00192112    | Hapln2             | Hyaluronan and proteoglycan link protein 2                                                                 | cell adhesion /binding     | 1.205              | ↑                   |
| IPI00373368    | Dpm1               | Dolichyl-phosphate mannosyltransferase polypeptide 1, catalytic subunit                                    | metabolic enzyme           | 1.207              | ↑                   |
| IPI00211214    | Usp8               | Ubiquitin carboxyl-terminal hydrolase                                                                      | Protein turnover           | 1.207              | ↑                   |
| IPI00417758    | Abhd16a            | Abhydrolase domain-containing protein 16A                                                                  | Protein turnover           | 1.207              | ↑                   |
| IPI00359162    | Dnajc11            | DnaJ (Hsp40) homolog, subfamily C, member 11                                                               | Chaperone                  | 1.207              | ↑                   |
| IPI00567379    | RGD1308874         | Isoform 1 of Adipocyte plasma membrane-associated protein                                                  | adipocyte differentiation  | 1.207              | ↑                   |
| IPI00191112    | Ndufab1            | Acyl carrier protein                                                                                       | Lipid metabolism           | 1.208              | ↑                   |
| IPI00950965    | Aprt               | Adenine phosphoribosyltransferase                                                                          | ATP biosynthesis           | 1.21               | ↑                   |
| IPI00230873    | Itrp1              | Isoform 2 of Inositol 1,4,5-trisphosphate receptor type 1                                                  | Ion channel                | 1.211              | ↑                   |
| IPI00192486    | Rps6               | 40S ribosomal protein S6                                                                                   | Protein turnover           | 1.212              | ↑                   |
| IPI00205519    | Uggt1              | UDP-glucose:glycoprotein glucosyltransferase 1                                                             | Chaperone                  | 1.212              | ↑                   |
| IPI00208038    | Eif3h              | Eukaryotic translation initiation factor 3 subunit H                                                       | Transcription/translation  | 1.213              | ↑                   |
| IPI00199865    | Farsa              | Phenylalanyl-tRNA synthetase alpha chain                                                                   | Amino acid metabolism      | 1.214              | ↑                   |
| IPI00366955    | Als2               | Alsin (amyotrophic lateral sclerosis 2 protein homolog)                                                    | Signaling                  | 1.214              | ↑                   |
| IPI00200225    | Fmod               | Fibromodulin                                                                                               | cellular stress response   | 1.214              | ↑                   |
| IPI00326436    | Oplah              | 5-oxoprolinase                                                                                             | Amino acid metabolism      | 1.215              | ↑                   |
| IPI00231381    | Mvp                | Major vault protein                                                                                        | Scaffolding                | 1.216              | ↑                   |
| IPI00324270    | Pacs1              | Isoform PACS-1a of Phosphofurin acidic cluster sorting protein 1                                           | Transport                  | 1.217              | ↑                   |
| IPI00231611    | Fh1                | Isoform mitochondrial of fumarate hydratase, mitochondrial                                                 | Glucose metabolism         | 1.22               | ↑                   |
| IPI00373418    | Dbt                | lipoamide acyltransferase component of branched-chain alpha-keto acid dehydrogenase complex, mitochondrial | Amino acid metabolism      | 1.22               | ↑                   |
| IPI00211997    | Ap3m2              | AP-3 complex subunit mu-2                                                                                  | Adaptor protein            | 1.221              | ↑                   |
| IPI00209303    | Fbxo2              | Neural F box protein NFB42                                                                                 | Neuroplasticity            | 1.223              | ↑                   |
| IPI00421969    | Abcf1              | ATP-binding cassette sub-family F member 1                                                                 | Transcription/translation  | 1.223              | ↑                   |
| IPI00372941    | Sam50              | Sorting and assembly machinery component 50 homolog                                                        | sorting /assembly          | 1.224              | ↑                   |
| IPI00768581    | Acsf3              | Acyl-CoA synthetase family member 3                                                                        | Lipid metabolism           | 1.227              | ↑                   |
| IPI00869998    | Psmb5              | Proteasome subunit beta type-5                                                                             | Protein turnover           | 1.227              | ↑                   |

(continued)

SUPPLEMENTARY TABLE S1. (CONTINUED)

| <i>IPI No.</i> | <i>Gene symbol</i> | <i>Protein name</i>                                                                      | <i>Biological function</i>      | <i>Fold change</i> | <i>State change</i> |
|----------------|--------------------|------------------------------------------------------------------------------------------|---------------------------------|--------------------|---------------------|
| IPI00188819    | Tmx2               | Thioredoxin-related transmembrane protein 2                                              | cell redox homeostasis          | 1.227              | ↑                   |
| IPI00207659    | Banf1              | Barrier-to-autointegration factor                                                        | chromatin protein               | 1.228              | ↑                   |
| IPI00188584    | Psmb2              | Proteasome subunit beta type-2                                                           | Protein turnover                | 1.229              | ↑                   |
| IPI00763392    | Clvs1              | Clavesin-1                                                                               | regulating lysosomal morphology | 1.229              | ↑                   |
| IPI00231819    | Mbp                | Isoform 1 of Myelin basic protein S                                                      | Cytoskeleton                    | 1.23               | ↑                   |
| IPI00358524    | Enpp6              | Ectonucleotide pyrophosphatase/phosphodiesterase family member 6                         | Lipid metabolism                | 1.232              | ↑                   |
| IPI00371860    | Sf3b4              | Splicing factor 3B subunit 4                                                             | RNA splicing                    | 1.232              | ↑                   |
| IPI00197585    | Myg1               | UPF0160 protein MYG1, mitochondrial                                                      |                                 | 1.232              | ↑                   |
| IPI00208878    | Trim32             | Tripartite motif protein 32                                                              | Neuroplasticity                 | 1.233              | ↑                   |
| IPI00362609    | Use1               | Unconventional SNARE in the ER 1 homolog                                                 | membrane fusion                 | 1.233              | ↑                   |
| IPI00193828    | Fxyd1              | Phospholemman                                                                            | Ion channel                     | 1.234              | ↑                   |
| IPI00764098    | Mcu                | Coiled-coil domain-containing protein 109A                                               | Ion channel                     | 1.236              | ↑                   |
| IPI00392306    | Sh3glb1            | Endophilin-B1                                                                            | Apoptosis                       | 1.237              | ↑                   |
| IPI00767739    | Asmtl              | Acetylserotonin O-methyltransferase-like                                                 | methyltransferase activity      | 1.237              | ↑                   |
| IPI00285606    | Cdc42              | Isoform 1 of Cell division control protein 42 homolog                                    | Signaling                       | 1.239              | ↑                   |
| IPI00817078    | Psmα7              | Proteasome subunit alpha type                                                            | Protein turnover                | 1.24               | ↑                   |
| IPI00371952    | Ubxn4              | UBX domain-containing protein 4                                                          | ERAD component                  | 1.242              | ↑                   |
| IPI00209908    | Mt-co2             | Cytochrome c oxidase subunit 2                                                           | Electron transport chain        | 1.243              | ↑                   |
| IPI00464877    | Hcn2               | Potassium/sodium hyperpolarization-activated cyclic nucleotide-gated channel 2           | Ion channel                     | 1.243              | ↑                   |
| IPI00554244    | Ampd2              | AMP deaminase 2                                                                          | energy metabolism               | 1.244              | ↑                   |
| IPI00192736    | Drg1               | Developmentally regulated GTP binding protein 1                                          | Signaling                       | 1.244              | ↑                   |
| IPI00212314    | Msn                | Moesin                                                                                   | Cytoskeleton                    | 1.244              | ↑                   |
| IPI00214889    | Psmβ3              | Proteasome subunit beta type-3                                                           | Protein turnover                | 1.246              | ↑                   |
| IPI00952133    | Pfn2               | Profilin                                                                                 | Cytoskeleton                    | 1.249              | ↑                   |
| IPI00470302    | Mpi                | Mannose-6-phosphate isomerase                                                            | Glucose metabolism              | 1.253              | ↑                   |
| IPI00947645    | Ttyh1              | Protein tweety homolog 1                                                                 | Ion channel                     | 1.254              | ↑                   |
| IPI00365149    | Coq9               | Ubiquinone biosynthesis protein COQ9, mitochondrial                                      | ATP biosynthesis                | 1.256              | ↑                   |
| IPI00209570    | Me2                | NAD-dependent malic enzyme, mitochondrial                                                | Glucose metabolism              | 1.258              | ↑                   |
| IPI00565128    | -                  | Glyceraldehyde-3-phosphate dehydrogenase                                                 | Glucose metabolism              | 1.26               | ↑                   |
| IPI00958502    | Adam22             | ADAM metallopeptidase domain 22                                                          | Protein turnover                | 1.26               | ↑                   |
| IPI00337111    | Rhot2              | Mitochondrial Rho GTPase 2                                                               | Transport                       | 1.263              | ↑                   |
| IPI00471774    | Rangap1            | RAN GTPase activating protein 1                                                          | Transport                       | 1.264              | ↑                   |
| IPI00560467    | F8a1               | Factor VIII intron 22 protein                                                            |                                 | 1.265              | ↑                   |
| IPI00870837    | Mlc1               | Megalencephalic leukoencephalopathy with subcortical cysts 1 homolog (Human) (Predicted) | Exocytosis/endocytosis          | 1.271              | ↑                   |
| IPI00195818    | Ipo9               | Protein Ipo9                                                                             | Transport                       | 1.272              | ↑                   |
| IPI00777831    | Abi1               | abl interactor 1                                                                         | Adaptor protein                 | 1.273              | ↑                   |
| IPI00359978    | Rps28              | 40S ribosomal protein S28                                                                | Protein turnover                | 1.276              | ↑                   |
| IPI00209744    | Agt                | Angiotensinogen                                                                          | Signaling                       | 1.28               | ↑                   |
| IPI00211812    | Copb1              | Coatomer subunit beta                                                                    | Neuroplasticity                 | 1.281              | ↑                   |
| IPI00781133    | Aco1               | Aconitase 1, soluble                                                                     | Glucose metabolism              | 1.29               | ↑                   |

(continued)

SUPPLEMENTARY TABLE S1. (CONTINUED)

| <i>IPI No.</i> | <i>Gene symbol</i> | <i>Protein name</i>                                               | <i>Biological function</i>               | <i>Fold change</i> | <i>State change</i> |
|----------------|--------------------|-------------------------------------------------------------------|------------------------------------------|--------------------|---------------------|
| IPI00208714    | Pip4k2b            | Phosphatidylinositol-5-phosphate 4-kinase type-2 beta             | inositol phosphate metabolism            | 1.291              | ↑                   |
| IPI00207370    | Ppp1r9b            | Neurabin-2                                                        | Scaffolding                              | 1.295              | ↑                   |
| IPI00366129    | Pitpnm1            | Membrane-associated phosphatidylinositol transfer protein 1       | Transport                                | 1.296              | ↑                   |
| IPI00191130    | Syt5               | Synaptotagmin-5                                                   | Exocytosis/endocytosis                   | 1.299              | ↑                   |
| IPI00192286    | Abca2              | ATP-binding cassette sub-family A member 2                        | Lipid metabolism                         | 1.3                | ↑                   |
| IPI00361216    | Adsl               | Adenylosuccinate lyase (Predicted)                                | metabolite enzymes / purine biosynthesis | 1.3                | ↑                   |
| IPI00777983    | Mbp                | Myelin basic protein S                                            | Neuroplasticity                          | 1.305              | ↑                   |
| IPI00373642    | Cugbp1             | CUGBP Elav-like family member 1                                   | Transcription/translation                | 1.305              | ↑                   |
| IPI00208277    | Pdap1              | 28 kDa heat- and acid-stable phosphoprotein                       | Neuroplasticity                          | 1.307              | ↑                   |
| IPI00209309    | Nlgn3              | Isoform 1 of Neuroligin-3                                         | Neuroplasticity                          | 1.308              | ↑                   |
| IPI00190778    | Nrgn               | Neurogranin                                                       | Neuroplasticity                          | 1.314              | ↑                   |
| IPI00206986    | Itp3               | Inositol 1,4,5-trisphosphate receptor type 3                      | Signaling                                | 1.315              | ↑                   |
| IPI00373505    | Tmod3              | Tropomodulin 3                                                    | Cytoskeleton                             | 1.317              | ↑                   |
| IPI00208382    | Ppt1               | Palmitoyl-protein thioesterase 1                                  | Apoptosis                                | 1.317              | ↑                   |
| IPI00191442    | Arl6ip5            | PRA1 family protein 3                                             | Cytoskeleton                             | 1.321              | ↑                   |
| IPI00198614    | Asb2               | Ankyrin repeat and SOCS box protein 2                             | Signaling                                | 1.322              | ↑                   |
| IPI00464791    | Acy1               | Aminoacylase-1A                                                   | Amino acid metabolism                    | 1.323              | ↑                   |
| IPI00202703    | Ostf1              | Osteoclast-stimulating factor 1                                   | osteoclast formation / activity          | 1.329              | ↑                   |
| IPI00371043    | Manf               | Mesencephalic astrocyte-derived neurotrophic factor               | Neuroplasticity                          | 1.333              | ↑                   |
| IPI00230907    | Mif                | Macrophage migration inhibitory factor                            | Immunity/inflammatory                    | 1.333              | ↑                   |
| IPI00207333    | Pafah1b3           | Platelet-activating factor acetylhydrolase IB subunit gamma       | Lipid metabolism                         | 1.334              | ↑                   |
| IPI00209690    | Ephx1              | Epoxide hydrolase 1                                               | Lipid metabolism                         | 1.339              | ↑                   |
| IPI00331878    | Slc5a3             | Solute carrier family 5 (inositol transporters), member 3         | Transport                                | 1.34               | ↑                   |
| IPI00779925    | Ctps2              | CTP synthase 2                                                    | Amino acid metabolism                    | 1.341              | ↑                   |
| IPI00199421    | Tsnax              | Translin-associated protein X                                     | Transcription/translation                | 1.342              | ↑                   |
| IPI00205537    | Map2k6             | Mitogen-activated protein kinase kinase 6, isoform CRA_a          | Signaling                                | 1.345              | ↑                   |
| IPI00361161    | Olr145             | Olfactory receptor Olr145                                         | Signaling                                | 1.347              | ↑                   |
| IPI00194565    | Prl8a3             | Prolactin-like protein-C variant                                  |                                          | 1.347              | ↑                   |
| IPI00198897    | Ndufa6             | NADH dehydrogenase [ubiquinone] 1 alpha subcomplex subunit 6      | Electron transport chain                 | 1.351              | ↑                   |
| IPI00480620    | Bdh1               | D-beta-hydroxybutyrate dehydrogenase, mitochondrial               | Lipid metabolism                         | 1.355              | ↑                   |
| IPI00213548    | Scn1b              | Voltage-gated sodium channel subunit beta1-A                      | Ion channel                              | 1.362              | ↑                   |
| IPI00198371    | Ap2s1              | AP-2 complex subunit sigma                                        | Adaptor protein                          | 1.362              | ↑                   |
| IPI00215523    | Bcat1              | Branched-chain-amino-acid aminotransferase, cytosolic             | Amino acid metabolism                    | 1.363              | ↑                   |
| IPI00214448    | Crym               | Mu-crystallin homolog                                             | hormone metabolism                       | 1.363              | ↑                   |
| IPI00422067    | Gnb4               | Guanine nucleotide-binding protein subunit beta-4                 | Signaling                                | 1.374              | ↑                   |
| IPI00230949    | Plcd1              | 1-phosphatidylinositol-4,5-bisphosphate phosphodiesterase delta-1 | Signaling                                | 1.375              | ↑                   |
| IPI00421376    | Tomm40             | Mitochondrial import receptor subunit TOM40 homolog               | Ion channel                              | 1.382              | ↑                   |
| IPI00369311    | -                  | Enolase                                                           | Glucose metabolism                       | 1.387              | ↑                   |

(continued)

SUPPLEMENTARY TABLE S1. (CONTINUED)

| <i>IPI No.</i> | <i>Gene symbol</i> | <i>Protein name</i>                                                   | <i>Biological function</i>                                    | <i>Fold change</i> | <i>State change</i> |
|----------------|--------------------|-----------------------------------------------------------------------|---------------------------------------------------------------|--------------------|---------------------|
| IPI00325272    | Becn1              | Beclin-1                                                              | autophagy                                                     | 1.388              | ↑                   |
| IPI00209385    | Apba1              | Amyloid beta A4 precursor protein-binding family A member 1           | Adaptor protein                                               | 1.389              | ↑                   |
| IPI00209297    | Nol3               | Nucleolar protein 3                                                   | Apoptosis                                                     | 1.396              | ↑                   |
| IPI00201455    | Yes1               | Tyrosine-protein kinase Yes                                           | Amino acid metabolism                                         | 1.402              | ↑                   |
| IPI00766690    | Farp1              | FERM, RhoGEF and pleckstrin domain-containing protein 1               | Cytoskeleton                                                  | 1.407              | ↑                   |
| IPI00190687    | Vcpip1             | Deubiquitinating protein VCIPI135                                     | Protein turnover                                              | 1.412              | ↑                   |
| IPI00231359    | Acads              | Acyl-Coenzyme A dehydrogenase, C-2 to C-3 short chain                 | Lipid metabolism                                              | 1.413              | ↑                   |
| IPI00325878    | Llg1               | Lethal(2) giant larvae protein homolog 1                              | Cytoskeleton                                                  | 1.416              | ↑                   |
| IPI00188364    | Itm2c              | Integral membrane protein 2C                                          | Neuroplasticity                                               | 1.427              | ↑                   |
| IPI00215463    | Calml3             | Calmodulin-like protein 3                                             | Neuroplasticity                                               | 1.428              | ↑                   |
| IPI00189098    | Aimp2              | Aminoacyl tRNA synthase complex-interacting multifunctional protein 2 | Scaffolding                                                   | 1.435              | ↑                   |
| IPI00195160    | Psap               | Sulfated glycoprotein 1                                               | Lipid metabolism                                              | 1.436              | ↑                   |
| IPI00209353    | Ilkap              | Integrin-linked kinase-associated serine/threonine phosphatase 2C     | Signaling                                                     | 1.439              | ↑                   |
| IPI00362084    | Dr1                | Protein Dr1                                                           | Transcription/translation                                     | 1.447              | ↑                   |
| IPI00362106    | Fermt2             | Fermitin family homolog 2 (Drosophila)                                | Cytoskeleton                                                  | 1.45               | ↑                   |
| IPI00392875    | Cdc42bpb           | Serine/threonine-protein kinase MRCK beta                             | Cytoskeleton                                                  | 1.451              | ↑                   |
| IPI00205022    | Nucb1              | Nucleobindin-1                                                        | calcium-binding protein                                       | 1.462              | ↑                   |
| IPI01016350    | Me1                | NADP-dependent malic enzyme                                           | Glucose metabolism                                            | 1.467              | ↑                   |
| IPI00358163    | Slc25a13           | Solute carrier family 25, member 13                                   | ATP biosynthesis                                              | 1.476              | ↑                   |
| IPI00326211    | Cpe                | Carboxypeptidase E                                                    | Protein turnover                                              | 1.48               | ↑                   |
| IPI00561751    | Ndufs5             | NADH dehydrogenase (ubiquinone) Fe-S protein 5                        | Electron transport chain                                      | 1.488              | ↑                   |
| IPI00205394    | Timm44             | Mitochondrial import inner membrane translocase subunit TIM44         | Adaptor protein                                               | 1.499              | ↑                   |
| IPI00476991    | Ncam1              | Neural cell adhesion molecule 1                                       | cell adhesion                                                 | 1.527              | ↑                   |
| IPI00734686    | Mt-co2             | Cytochrome c oxidase subunit 2                                        | Electron transport chain                                      | 1.539              | ↑                   |
| IPI00208348    | Pdxk               | Pyridoxal kinase                                                      | Vitamin B8 metabolism                                         | 1.584              | ↑                   |
| IPI00948302    | Atp5c1             | ATP synthase gamma chain                                              | ATP biosynthesis                                              | 1.586              | ↑                   |
| IPI00359253    | Slc30a9            | Protein Slc30a9                                                       | Cytoskeleton                                                  | 1.607              | ↑                   |
| IPI00189989    | Spr                | Sepiapterin reductase                                                 | metabolite enzymes / tetrahydrobiopterin biosynthetic process | 1.613              | ↑                   |
| IPI00199986    | Fen1               | Flap endonuclease 1                                                   | DNA metabolism                                                | 1.619              | ↑                   |
| IPI00475474    | Rps4x              | 40S ribosomal protein S4, X isoform                                   | Protein turnover                                              | 1.626              | ↑                   |
| IPI00763058    | Arhgap21           | Protein Arhgap21                                                      | Signaling                                                     | 1.631              | ↑                   |
| IPI00764532    | Ifi44              | Interferon-induced protein 44, isoform CRA_a                          | Immunity/inflammatory                                         | 1.645              | ↑                   |
| IPI00950139    | Mrpl46             | 39S ribosomal protein L46, mitochondrial                              | Protein turnover                                              | 1.65               | ↑                   |
| IPI00366160    | Dpf2               | Zinc finger protein ubi-d4                                            | Apoptosis                                                     | 1.651              | ↑                   |
| IPI00198444    | Gatm               | Glycine amidinotransferase, mitochondrial                             | metabolism/creatine biosynthesis                              | 1.678              | ↑                   |
| IPI00199604    | Cadps              | Calcium-dependent secretion activator 1                               | Exocytosis/endocytosis                                        | 1.678              | ↑                   |
| IPI00785576    | Ttc39c             | Tetratricopeptide repeat protein 39C                                  |                                                               | 1.682              | ↑                   |
| IPI00331898    | Fam21c             | WASH complex subunit FAM21                                            | Transport                                                     | 1.696              | ↑                   |
| IPI00364365    | Isg20              | Interferon stimulated exonuclease 20                                  | Immunity/inflammatory                                         | 1.701              | ↑                   |

(continued)

SUPPLEMENTARY TABLE S1. (CONTINUED)

| <i>IPI No.</i> | <i>Gene symbol</i> | <i>Protein name</i>                                            | <i>Biological function</i> | <i>Fold change</i> | <i>State change</i> |
|----------------|--------------------|----------------------------------------------------------------|----------------------------|--------------------|---------------------|
| IPI00655249    | Echdc3             | Enoyl-CoA hydratase domain-containing protein 3, mitochondrial | Lipid metabolism           | 1.711              | ↑                   |
| IPI00991200    | Ryr2               | Ryanodine receptor 2                                           | Ion channel                | 1.782              | ↑                   |
| IPI00369693    | Osbpl8             | Oxysterol-binding protein                                      | Lipid metabolism           | 1.785              | ↑                   |
| IPI00357936    | Dtd1               | D-tyrosyl-tRNA(Tyr) deacylase                                  | Amino acid metabolism      | 1.838              | ↑                   |
| IPI00210431    | Dhcr7              | 7-dehydrocholesterol reductase                                 | Lipid metabolism           | 1.861              | ↑                   |
| IPI00197468    | Smu1               | WD40 repeat-containing protein SMU1                            | splicing factor            | 1.88               | ↑                   |
| IPI00363160    | Sephs1             | Selenide, water dikinase 1                                     | Neuroplasticity            | 1.925              | ↑                   |
| IPI00769218    | RGD1565368         | Glyceraldehyde-3-phosphate dehydrogenase-like                  | Glucose metabolism         | 1.995              | ↑                   |
| IPI00764713    | Klc1               | Isoform A of Kinesin light chain 1                             | Adaptor protein            | 2.188              | ↑                   |
| IPI00324991    | Lbr                | Lamin-B receptor                                               | Cytoskeleton               | 2.276              | ↑                   |
| IPI00206172    | Mapk3              | Isoform 1 of Mitogen-activated protein kinase 3                | Signaling                  | 2.434              | ↑                   |
| IPI00197711    | Ldha               | L-lactate dehydrogenase A chain                                | Glucose metabolism         | 2.644              | ↑                   |
| IPI00779069    | Tanc1              | Protein TANC1                                                  | Scaffolding                | 2.75               | ↑                   |
| IPI00368449    | Pmm2               | Phosphomannomutase 2                                           | Glucose metabolism         | 2.948              | ↑                   |
| IPI00561715    | Gtf2i              | General transcription factor II-I                              | Transcription/translation  | 3.008              | ↑                   |
| IPI00554196    | Itsn1              | Intersectin 1                                                  | Adaptor protein            | 3.138              | ↑                   |
| IPI00231023    | Syn1               | Isoform IB of Synapsin-1                                       | Neuroplasticity            | 3.461              | ↑                   |
| IPI00464648    | Ccdc91             | Coiled-coil domain-containing protein 91                       | Transport                  | 3.918              | ↑                   |
| IPI00362457    | Ccdc150            | Coiled-coil domain containing 150-like                         |                            | 4.696              | ↑                   |

State change: arrows represent up/downregulation in depressed rats relative to controls.  
112 uncharacterized proteins were not listed in this table.
